# Supplementary material for: Ants, Cataglyphis cursor, Use Precisely Directed Rescue Behavior to Free Entrapped Relatives
Source: PubMed Central journal article supplement (PMC2719796; doi:10.1371/journal.pone.0006573), 2009-08-12
Supplement: pone.0006573.s002.pdf [file pone.0006573.s002.pdf]

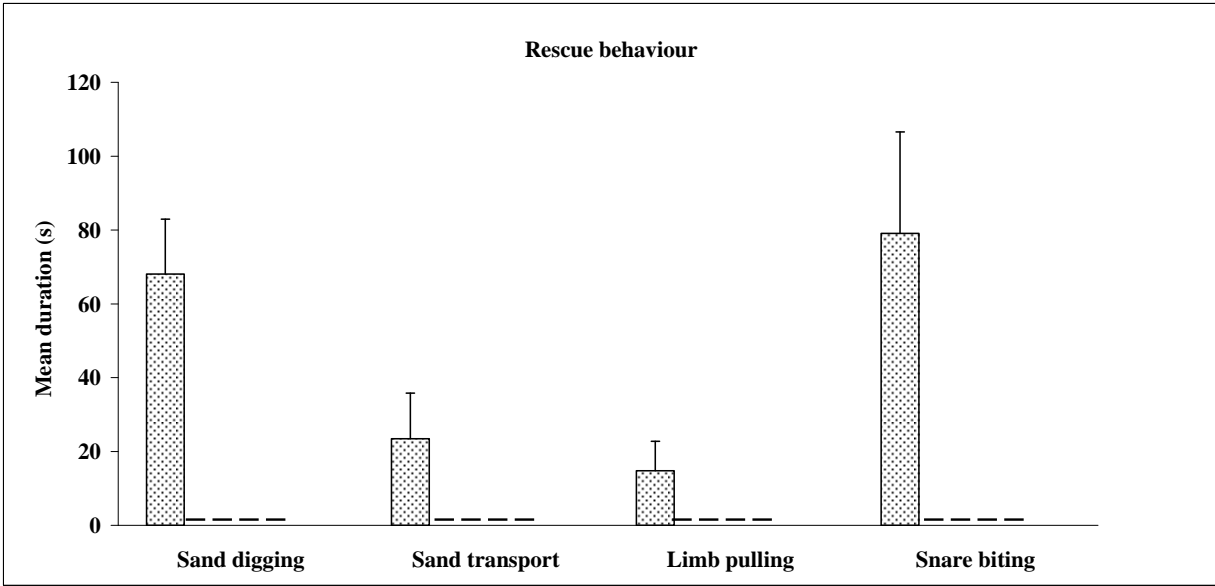

■ Homocolonial   ■ Heterocolonial   ■ Heterospecific   ■ Prey   □ Controls
