# Supplementary material for: Ants, Cataglyphis cursor, Use Precisely Directed Rescue Behavior to Free Entrapped Relatives
Source: PubMed Central journal article supplement (PMC2719796; doi:10.1371/journal.pone.0006573), 2009-08-12
Supplement: pone.0006573.s003.pdf [file pone.0006573.s003.pdf]

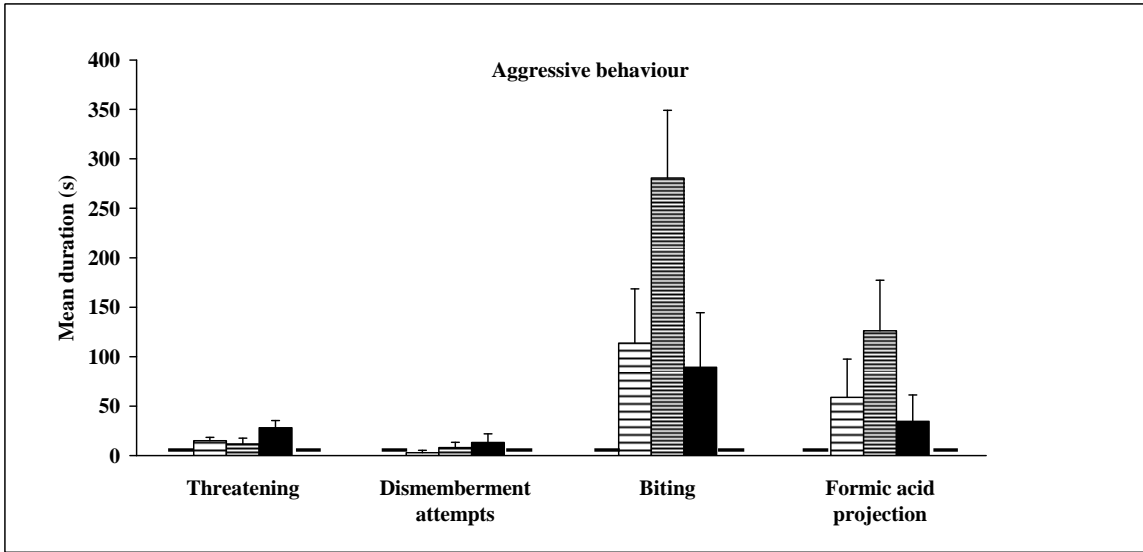

 Homocolonial     Heterocolonial     Heterospecific     Prey     Controls
